# Supplementary material
Source: PubMed Central journal article supplement (PMC2832599)
Supplement: NIHMS112369-supplement-supplemental_material.pdf [file NIHMS112369-supplement-supplemental_material.pdf]

**Supplementary material:**

The Matlab routine used to simulate the noise superimposed onto the simulated single channel recording.

```
data=ldt_read2('file name');  
n=randn(length(data));  
noise=x*(n-mean(n))/std(n);  
new_data=[data(:,1),data(:,2)+noise];
```
